# Supplementary material for: Metabolic response to low-level toxicant exposure in a novel renal tubuleepithelial cell system
Source: Royal Society of Chemistry journal article supplement (doi:10.1039/c0mb00146e), 2010-11-19
Supplement: c0mb00146e.pdf [file c0mb00146e.pdf]

This supplementary information completely replaces the previous version. 1st April 2011.

Supplementary Table

| Intracellular                |                 |                   |                   |                   |                   |                   |                   |
|------------------------------|-----------------|-------------------|-------------------|-------------------|-------------------|-------------------|-------------------|
| Metabolites                  | Time point (hr) | Monuron           | Nifedipine        | KBrO <sub>3</sub> | Mannitol          | Diclofenac        | Ochratoxin A      |
| Betaine<br>3.261-3.286       | 6               | 0.94 ±0.05        | 0.84 ±0.03        | 0.99 ±0.06        | 1.00 ±0.01        | 0.93 ±0.08        | 1.02 ±0.04        |
|                              | 24              | <i>0.83 ±0.01</i> | 1.04 ±0.01        | <b>0.67 ±0.04</b> | 0.92 ±0.06        | 1.17 ±0.11        | <i>0.74 ±0.05</i> |
|                              | 72              | 0.97 ±0.08        | 0.90 ±0.04        | <b>0.25 ±0.01</b> | <i>0.77 ±0.03</i> | 1.29 ±0.02        | <b>0.53 ±0.13</b> |
| Alanine<br>1.475-1.503       | 6               | 1.08 ±0.01        | 0.91 ±0.06        | 1.03 ±0.02        | 0.89 ±0.01        | <i>1.37 ±0.10</i> | 1.05 ±0.01        |
|                              | 24              | 1.07 ±0.04        | 0.94 ±0.03        | 1.12 ±0.04        | 0.88 ±0.04        | 0.87 ±0.12        | 1.14 ±0.03        |
|                              | 72              | 0.90 ±0.02        | 1.03 ±0.02        | <b>1.62 ±0.01</b> | <i>0.70 ±0.04</i> | <b>0.58 ±0.04</b> | <i>1.24 ±0.04</i> |
| Isoleucine<br>0.9278-0.9335  | 6               | 0.89 ±0.06        | 0.94 ±0.05        | 1.05 ±0.05        | 0.95 ±0.06        | 1.07 ±0.06        | 0.96 ±0.06        |
|                              | 24              | 0.70 ±0.09        | 1.04 ±0.05        | 1.05 ±0.03        | 1.02 ±0.06        | 0.98 ±0.10        | 1.14 ±0.12        |
|                              | 72              | 0.98 ±0.08        | 1.00 ±0.13        | <i>1.37 ±0.04</i> | <i>0.83 ±0.04</i> | 0.96 ±0.03        | <i>0.71 ±0.02</i> |
| Aspartate<br>1.322-1.681     | 6               | 1.16 ±0.03        | 1.01 ±0.02        | 1.01 ±0.04        | 0.98 ±0.03        | 1.09 ±0.07        | 1.22 ±0.06        |
|                              | 24              | 1.15 ±0.04        | 1.00 ±0.03        | 0.93 ±0.01        | 0.99 ±0.02        | 1.13 ±0.01        | 0.92 ±0.07        |
|                              | 72              | 1.02 ±0.02        | 0.99 ±0.01        | 0.84 ±0.01        | 1.03 ±0.07        | <i>1.30 ±0.01</i> | <i>0.77 ±0.09</i> |
| Lactate<br>1.322-1.329       | 6               | 0.94 ±0.05        | 0.84 ±0.03        | 0.99 ±0.06        | <i>0.81 ±0.06</i> | <b>1.61 ±0.13</b> | 0.94 ±0.04        |
|                              | 24              | <i>0.83 ±0.01</i> | 1.04 ±0.01        | <i>0.70 ±0.04</i> | <i>0.75 ±0.05</i> | <i>1.21 ±0.14</i> | <b>1.55 ±0.11</b> |
|                              | 72              | 0.97 ±0.08        | 0.90 ±0.08        | <b>0.32 ±0.01</b> | <i>0.72 ±0.15</i> | <b>0.60 ±0.11</b> | <i>0.82 ±0.02</i> |
| Myoinositol<br>4.06-4.094    | 6               | 0.97 ±0.02        | 0.9 ±0.04         | 0.98 ±0.03        | 1.04 ±0.01        | 0.89 ±0.07        | 1.03 ±0.06        |
|                              | 24              | 0.86 ±0.01        | 1.03 ±0.01        | 0.94 ±0.04        | 0.96 ±0.03        | 0.99 ±0.08        | <i>0.77 ±0.04</i> |
|                              | 72              | 1.01 ±0.05        | <i>0.88 ±0.02</i> | 0.90 ±0.01        | 0.86 ±0.01        | 0.95 ±0.01        | <i>0.80 ±0.10</i> |
| GPC<br>3.231-3.242           | 6               | <i>0.72 ±0.04</i> | <i>0.81 ±0.02</i> | 0.97 ±0.02        | 0.90 ±0.03        | <i>1.28 ±0.07</i> | 1.00 ±0.01        |
|                              | 24              | <b>0.48 ±0.05</b> | 0.96 ±0.02        | <i>1.49 ±0.07</i> | <i>0.82 ±0.01</i> | <i>1.36 ±0.08</i> | <i>0.82 ±0.06</i> |
|                              | 72              | <i>0.71 ±0.04</i> | 1.05 ±0.05        | <b>1.76 ±0.05</b> | <b>0.67 ±0.02</b> | <i>0.81 ±0.02</i> | 0.93 ±0.13        |
| PC<br>3.216-3.231            | 6               | 0.98 ±0.03        | 0.87 ±0.05        | 0.92 ±0.05        | 1.06 ±0.01        | 0.85 ±0.04        | 1.06 ±0.04        |
|                              | 24              | 0.98 ±0.05        | 0.99 ±0.01        | 1.13 ±0.07        | 1.01 ±0.02        | <i>0.79 ±0.07</i> | <i>0.79 ±0.03</i> |
|                              | 72              | 1.12 ±0.07        | <i>0.75 ±0.02</i> | <i>0.83 ±0.04</i> | <i>0.75 ±0.01</i> | <i>0.84 ±0.03</i> | 0.99 ±0.07        |
| Choline<br>3.204-3.216       | 6               | 1.05 ±0.01        | 0.91 ±0.01        | 0.82 ±0.05        | 1.03 ±0.02        | 1.03 ±0.03        | 1.00 ±0.08        |
|                              | 24              | 1.00 ±0.09        | 1.09 ±0.01        | <i>0.69 ±0.06</i> | 1.02 ±0.06        | 1.09 ±0.05        | 0.97 ±0.11        |
|                              | 72              | <i>0.69 ±0.03</i> | <i>0.76 ±0.02</i> | <b>0.38 ±0.09</b> | <b>0.52 ±0.01</b> | 0.90 ±0.02        | 0.94 ±0.14        |
| GSH/GSSG<br>2.186-2.199      | 6               | 1.05 ±0.02        | 0.90 ±0.03        | 0.90 ±0.03        | 1.10 ±0.04        | 0.93 ±0.01        | 1.09 ±0.05        |
|                              | 24              | 1.04 ±0.02        | 0.90 ±0.01        | 0.90 ±0.04        | 1.03 ±0.07        | 0.94 ±0.03        | 0.85 ±0.01        |
|                              | 72              | 1.06 ±0.02        | 0.92 ±0.02        | <i>1.32 ±0.02</i> | 1.11 ±0.09        | <i>1.23 ±0.04</i> | 1.06 ±0.07        |
| Culture media                |                 |                   |                   |                   |                   |                   |                   |
| Metabolites                  | Time point (hr) | Monuron           | Nifedipine        | KBrO <sub>3</sub> | Mannitol          | Diclofenac        | Ochratoxin A      |
| Alanine<br>1.46-1.492        | 6               | 0.99 ±0.01        | 0.94 ±0.01        | 0.96 ±0.01        | 0.97 ±0.02        | 0.95 ±0.01        | 1.01 ±0.01        |
|                              | 24              | 0.95 ±0.03        | 0.94 ±0.02        | 0.90 ±0.03        | 0.97 ±0.02        | <i>0.79 ±0.03</i> | 0.98 ±0.02        |
|                              | 72              | 0.85 ±0.04        | 0.92 ±0.01        | 1.03 ±0.01        | 0.95 ±0.03        | <b>0.57 ±0.03</b> | 1.14 ±0.14        |
| Pyruvate<br>2.37-2.385       | 6               | 1.07 ±0.01        | 1.03 ±0.01        | 0.97 ±0.02        | 0.92 ±0.01        | <i>1.40 ±0.02</i> | 1.02 ±0.01        |
|                              | 24              | 1.03 ±0.02        | 0.89 ±0.01        | 0.99 ±0.03        | 0.94 ±0.05        | <b>1.87 ±0.06</b> | 1.11 ±0.01        |
|                              | 72              | 0.85 ±0.06        | 0.95 ±0.01        | <i>1.42 ±0.01</i> | <i>0.83 ±0.05</i> | <b>1.66 ±0.03</b> | <b>2.08 ±0.15</b> |
| 5-OP<br>4.162-4.183          | 6               | 1.10 ±0.02        | <i>1.23 ±0.01</i> | <i>0.80 ±0.06</i> | <b>0.54 ±0.15</b> | 0.97 ±0.15        | 0.90 ±0.09        |
|                              | 24              | <i>1.25 ±0.02</i> | <i>1.31 ±0.02</i> | 1.07 ±0.06        | <i>0.69 ±0.07</i> | 1.11 ±0.05        | 0.99 ±0.06        |
|                              | 72              | 1.02 ±0.04        | 1.04 ±0.01        | 1.16 ±0.01        | 0.96 ±0.05        | 1.19 ±0.06        | 1.19 ±0.05        |
| Glucose<br>5.221-5.260       | 6               | 0.99 ±0.01        | 0.98 ±0.01        | 0.97 ±0.02        | 0.94 ±0.01        | 1.07 ±0.02        | 0.97 ±0.02        |
|                              | 24              | 1.02 ±0.02        | 1.14 ±0.01        | 1.00 ±0.02        | 0.92 ±0.03        | 1.14 ±0.01        | 0.98 ±0.02        |
|                              | 72              | 1.06 ±0.12        | <i>1.27 ±0.02</i> | <b>0.34 ±0.01</b> | <i>0.82 ±0.06</i> | 0.90 ±0.04        | <b>0.33 ±0.07</b> |
| Lactate<br>1.333-1.353       | 6               | 1.03 ±0.02        | <i>0.78 ±0.05</i> | 0.92 ±0.06        | <i>1.23 ±0.06</i> | <b>0.42 ±0.01</b> | 1.18 ±0.14        |
|                              | 24              | 0.88 ±0.04        | <i>0.68 ±0.04</i> | 1.00 ±0.09        | 0.96 ±0.04        | <b>0.51 ±0.04</b> | 1.04 ±0.09        |
|                              | 72              | <i>0.83 ±0.08</i> | 0.95 ±0.01        | <b>2.01 ±0.05</b> | <i>0.83 ±0.09</i> | 0.99 ±0.06        | <b>2.78 ±0.03</b> |
| Isoleucine<br>0.9204-0.9318  | 6               | 0.97 ±0.02        | 0.98 ±0.01        | 0.97 ±0.01        | 0.91 ±0.01        | 1.06 ±0.02        | 0.98 ±0.01        |
|                              | 24              | 0.97 ±0.01        | 1.01 ±0.01        | 0.98 ±0.02        | 0.90 ±0.03        | 1.09 ±0.01        | 1.07 ±0.01        |
|                              | 72              | 0.89 ±0.03        | 0.90 ±0.02        | <b>0.59 ±0.29</b> | 0.94 ±0.02        | 1.09 ±0.02        | 1.13 ±0.03        |
| Lysine<br>1.822-1.918        | 6               | 0.99 ±0.02        | 0.97 ±0.01        | 0.96 ±0.01        | 0.93 ±0.01        | 1.03 ±0.02        | 0.94 ±0.01        |
|                              | 24              | 0.96 ±0.01        | 0.99 ±0.02        | 0.95 ±0.01        | 0.94 ±0.02        | 1.00 ±0.01        | 1.03 ±0.01        |
|                              | 72              | 0.95 ±0.02        | 0.96 ±0.01        | 0.84 ±0.01        | 1.00 ±0.01        | 0.94 ±0.01        | 1.03 ±0.01        |
| Glutamine<br>2.07-2.139      | 6               | 1.00 ±0.01        | 0.98 ±0.01        | 1.01 ±0.01        | 0.97 ±0.01        | 1.00 ±0.01        | 0.95 ±0.01        |
|                              | 24              | 0.94 ±0.01        | 0.98 ±0.01        | 0.94 ±0.01        | 0.95 ±0.03        | 0.98 ±0.01        | 1.01 ±0.01        |
|                              | 72              | 0.96 ±0.06        | 0.98 ±0.02        | <i>0.80 ±0.01</i> | 0.88 ±0.03        | <i>0.80 ±0.01</i> | 1.12 ±0.07        |
| Phenylalanine<br>7.355-7.368 | 6               | <i>0.83 ±0.01</i> | <i>0.83 ±0.01</i> | 1.01 ±0.01        | 0.87 ±0.01        | 1.14 ±0.02        | 0.97 ±0.01        |
|                              | 24              | 0.82 ±0.02        | <i>0.82 ±0.01</i> | 0.95 ±0.01        | 0.89 ±0.03        | 0.94 ±0.01        | 1.14 ±0.02        |
|                              | 72              | <i>0.82 ±0.03</i> | <i>0.82 ±0.01</i> | <i>0.82 ±0.01</i> | 1.06 ±0.02        | 0.98 ±0.04        | 0.93 ±0.03        |
| Tyrosine<br>6.871-6.907      | 6               | 0.99 ±0.02        | 0.99 ±0.01        | 0.98 ±0.01        | 0.93 ±0.01        | 1.05 ±0.02        | 0.98 ±0.02        |
|                              | 24              | 1.01 ±0.02        | 1.03 ±0.01        | 0.98 ±0.01        | 0.93 ±0.03        | 1.01 ±0.01        | 1.05 ±0.01        |
|                              | 72              | 0.92 ±0.04        | 1.00 ±0.01        | 0.86 ±0.01        | 1.00 ±0.02        | 0.99 ±0.02        | 1.05 ±0.04        |
| Tryptophan<br>4.06-4.08      | 6               | 0.97 ±0.02        | <i>1.32 ±0.04</i> | 0.99 ±0.01        | <b>0.51 ±0.10</b> | 1.04 ±0.07        | 0.91 ±0.06        |
|                              | 24              | 1.03 ±0.06        | 1.17 ±0.08        | 0.98 ±0.08        | <b>0.36 ±0.04</b> | <i>1.23 ±0.05</i> | <i>1.40 ±0.01</i> |
|                              | 72              | 1.10 ±0.16        | <i>1.35 ±0.10</i> | <i>0.79 ±0.14</i> | <b>0.23 ±0.11</b> | <i>1.44 ±0.10</i> | <b>2.66 ±0.22</b> |
| Threonine<br>1.298-1.324     | 6               | 0.99 ±0.02        | 0.99 ±0.02        | 0.97 ±0.01        | 0.93 ±0.01        | 0.98 ±0.02        | 1.02 ±0.01        |
|                              | 24              | 1.09 ±0.01        | 0.97 ±0.08        | 1.02 ±0.03        | 0.89 ±0.04        | <i>0.80 ±0.07</i> | 1.07 ±0.04        |
|                              | 72              | 0.89 ±0.03        | 0.97 ±0.01        | 0.93 ±0.01        | 1.02 ±0.03        | 0.94 ±0.08        | 1.04 ±0.03        |
| Leucine<br>0.957-0.9769      | 6               | 0.98 ±0.01        | 0.99 ±0.01        | 0.97 ±0.01        | 0.93 ±0.02        | 1.04 ±0.02        | 0.98 ±0.01        |
|                              | 24              | 0.97 ±0.01        | 1.02 ±0.01        | 0.98 ±0.01        | 0.91 ±0.02        | 1.09 ±0.01        | 1.06 ±0.01        |
|                              | 72              | 0.93 ±0.03        | 0.91 ±0.01        | 0.88 ±0.01        | 0.92 ±0.02        | 1.06 ±0.01        | 1.18 ±0.05        |

Supplementary Table S1. Effects of Chemical Treatment on Key Metabolite Concentration in the RPTEC/TERT1 Intracellular Fraction and Culture Medium. Data are shown as means +/- s.e.m. and are expressed relative to the time-matched control. Bold indicates significant changes >1.5 fold. Italics indicate other statistically significant changes (p<0.05).
